# Supplementary material for: In Vitro Induction of Interspecific Hybrid and Polyploidy Derived from Oryza officinalis Wall
Source: MDPI journal article supplement (doi:10.3390/plants12163001), 2023-08-20
Supplement: s1 [file s1]

**Table S1.** Tissue culture for callus differentiation

| Combination<br>Name | Medium<br>Name | BA<br>Concentration<br>(mg·L <sup>-1</sup> ) | KIN<br>Concentration<br>(mg·L <sup>-1</sup> ) | NAA<br>Concentration<br>(mg·L <sup>-1</sup> ) |
|---------------------|----------------|----------------------------------------------|-----------------------------------------------|-----------------------------------------------|
| F1                  | MS             | 2.0                                          | 0.0                                           | 0.4                                           |
| F2                  | MS             | 2.0                                          | 0.0                                           | 0.2                                           |
| F3                  | MS             | 0.0                                          | 2.0                                           | 0.2                                           |
| F4                  | MS             | 2.0                                          | 2.0                                           | 1.0                                           |

**Table S2.** Effect of BA concentration on callus proliferation in the interspecific hybrid

| Cultivation<br>name | BA concentration<br>(mg·L <sup>-1</sup> ) | Seedling emergence<br>rate (%) | Browning rate<br>(%) |
|---------------------|-------------------------------------------|--------------------------------|----------------------|
| J1                  | 0.0                                       | 821.92±74.59ab                 | 3.75                 |
| J2                  | 0.2                                       | 1036.43±200.98a                | 1.58                 |
| J3                  | 0.5                                       | 617.46±122.5b                  | 3.89                 |

Note: Data in the results data table represented as mean±standard error (SE). Different lowercase letters represent significant differences when  $P < 0.05$ .

**Table S3.** Effect of colchicine co-culture on callus

| Colchicine<br>concentration<br>(mg·L <sup>-1</sup> ) | Processing<br>time (d) | Treatment number | Survival rate<br>(%) | Number of<br>plants have | Seedling<br>rate (%) |
|------------------------------------------------------|------------------------|------------------|----------------------|--------------------------|----------------------|
| 0 (CK)                                               | 3                      | 46               | 86.96                | 11                       | 23.91                |
| 300                                                  | 3                      | 45               | 40.00                | 1                        | 2.22                 |
|                                                      | 5                      | 50               | 26.00                | 0                        | 0.00                 |
| 400                                                  | 3                      | 45               | 68.89                | 6                        | 13.33                |
|                                                      | 5                      | 45               | 26.67                | 1                        | 2.22                 |
| 500                                                  | 3                      | 54               | 44.44                | 4                        | 7.41                 |
|                                                      | 5                      | 54               | 22.22                | 0                        | 0.00                 |
| 600                                                  | 3                      | 62               | 14.52                | 1                        | 1.61                 |
|                                                      | 5                      | 45               | 2.22                 | 0                        | 0.00                 |
